# Supplementary material for: Structural Insights into the Marine Alkaloid Discorhabdin G as a Scaffold towards New Acetylcholinesterase Inhibitors
Source: MDPI journal article supplement (doi:10.3390/md22040173), 2024-04-12
Supplement: s1 [file s1]

## Supplementary Materials

### Structural Insights into the Marine Alkaloid Discorhabdin G as a Scaffold for New Acetylcholinesterase Inhibitors

Andrea Defant <sup>1,\*</sup>, Giacomo Carloni <sup>1,2</sup>, Nicole Innocenti <sup>1</sup>, Tomaž Trobec <sup>3</sup>, Robert Frangež <sup>3</sup>, Kristina Sepčić <sup>4</sup> and Ines Mancini <sup>1,\*</sup>

<sup>1</sup> Laboratory of Bioorganic Chemistry, Department of Physics, University of Trento, Via Sommarive 14, 38123 Trento, Italy

<sup>2</sup> Present address: Unité de Microbiologie Structurale, Institut Pasteur, CNRS, Université Paris Cité, Paris 75015, France; [giacomo.carloni@pasteur.fr](mailto:giacomo.carloni@pasteur.fr)

<sup>3</sup> Institute of Preclinical Sciences, Veterinary Faculty, University of Ljubljana, Gerbičeva 60, 1000 Ljubljana, Slovenia; [tomaz.trobec@vf.uni-lj.si](mailto:tomaz.trobec@vf.uni-lj.si); [robert.frangez@vf.uni-lj.si](mailto:robert.frangez@vf.uni-lj.si)

<sup>4</sup> Department of Biology, Biotechnical Faculty, University of Ljubljana, Jamnikarjeva 101, 1000 Ljubljana, Slovenia; [kristina.sepcic@bf.uni-lj.si](mailto:kristina.sepcic@bf.uni-lj.si)

\* Correspondence: [ines.mancini@unitn.it](mailto:ines.mancini@unitn.it) (I.M.); [andrea.defant@ex-staff.unitn.it](mailto:andrea.defant@ex-staff.unitn.it) (A.D.)

#### Contents

**Table S1.** Distribution (%) among neutral structure and protonated forms of the compounds **2** and **3** as a function of pH values, as evaluated by MarvinSketch software.

**Figure S1.** Druglikeness prediction for (a) discorhabdin G (**1**), (b) compound **2** and (c) compound **3** by Molsoft L.L.C.

**Figure S2.** Purity evaluation of **3**, **7**, and **8** subjected to bioassays by HPLC analysis (Phenomenex Gemini 5µm C18 110A column, in gradient conditions (CH<sub>3</sub>CN to 30%, *t*<sub>8 min</sub> 80%, and *t*<sub>22 min</sub> 80%), flow 1 mL/min, λ 254nm).

**Figure S3.** Inhibition of electric eel acetylcholinesterase (eeAChE, ●), human recombinant acetylcholinesterase (hAChE, ●) or horse serum butyrylcholinesterase (BChE, ●) by increasing concentrations of compounds **3** (A), **7** (B) and **8** (C). The activity was monitored as described in the Chapter 3.2.

**Figure S4.** Determination of type of inhibition and inhibition constants (K<sub>i</sub>) for (a) compound **3** and (b) compound **7** towards electric eel acetylcholinesterase (eeAChE), human recombinant acetylcholinesterase (hAChE), and horse serum butyrylcholinesterase (BChE) by Dixon plot analysis. Substrate (acetylthiocholine chloride) concentrations: 0.125 mM (▲), 0.25 mM (●), 0.5 mM (■).

**Figure S5.** Two-dimensional views of the interactions, by AutoDock Vina calculation, between *T. californica* AChE (6G1V) and **7** and **8**.

**Figure S6.** <sup>1</sup>H NMR spectrum (400 MHz, in CDCl<sub>3</sub>) of compound **3** as acetate salt, and <sup>13</sup>CNMR spectrum (100 MHz, in CDCl<sub>3</sub>) of neutral **3**.

**Figure S7.** <sup>1</sup>H and <sup>13</sup>CNMR spectra in CDCl<sub>3</sub>, at 400 MHz and 100 MHz respectively of compound **7**.

**Figure S8.** <sup>1</sup>H and <sup>13</sup>CNMR spectra in CDCl<sub>3</sub>, at 400 MHz and 100 MHz respectively of compound **8**.

**Table S1.** Percentage distribution among neutral structure A and protonated forms of the compounds **2** and **3** as a function of pH values, as evaluated by MarvinSketch software.

| Compound 2 |                                                                                   |                                                                                   |                                                                                    |                                                                                     |
|------------|-----------------------------------------------------------------------------------|-----------------------------------------------------------------------------------|------------------------------------------------------------------------------------|-------------------------------------------------------------------------------------|
| pH         | 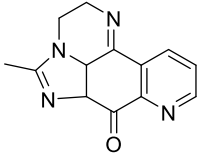 |  |  |  |
| 4.00       | 52.499                                                                            | 0.125                                                                             | 47.293                                                                             | 0.078                                                                               |
| 5.00       | 91.714                                                                            | 0.022                                                                             | 8.262                                                                              | 0.001                                                                               |
| 7.40       | 99.964                                                                            | 0.000                                                                             | 0.036                                                                              | 0.000                                                                               |
| 9.00       | 99.999                                                                            | 0.000                                                                             | 0.001                                                                              | 0.000                                                                               |

  

| Compound 3 |                                                                                    |                                                                                    |                                                                                     |                                                                                      |
|------------|------------------------------------------------------------------------------------|------------------------------------------------------------------------------------|-------------------------------------------------------------------------------------|--------------------------------------------------------------------------------------|
| pH         |  |  |  |  |
| 4.00       | 46.885                                                                             | 1.733                                                                              | 50.841                                                                              | 0.541                                                                                |
| 5.00       | 89.908                                                                             | 0.332                                                                              | 9.749                                                                               | 0.010                                                                                |
| 7.40       | 99.955                                                                             | 0.001                                                                              | 0.043                                                                               | 0.000                                                                                |
| 9.00       | 99.999                                                                             | 0.000                                                                              | 0.001                                                                               | 0.000                                                                                |

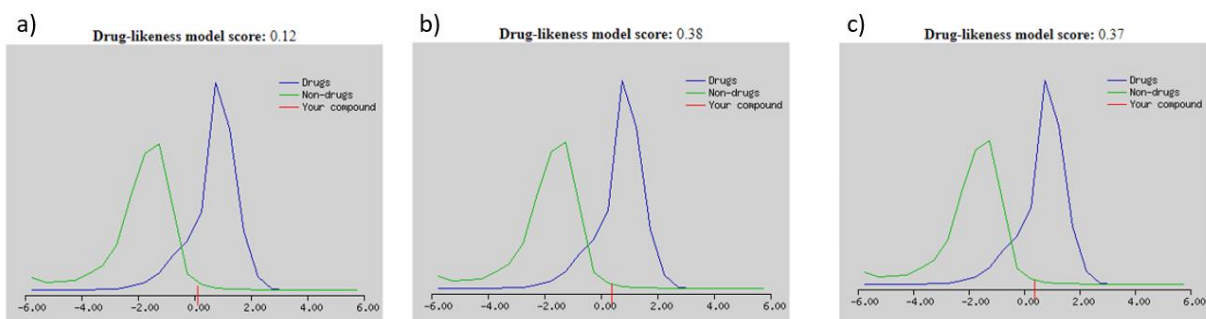

**Figure S1.** Druglikeness prediction for discorhabdin G(**1**), (a); compounds **2** (b) and **3** (c) by Molsoft L.L.C.

### Compound 3

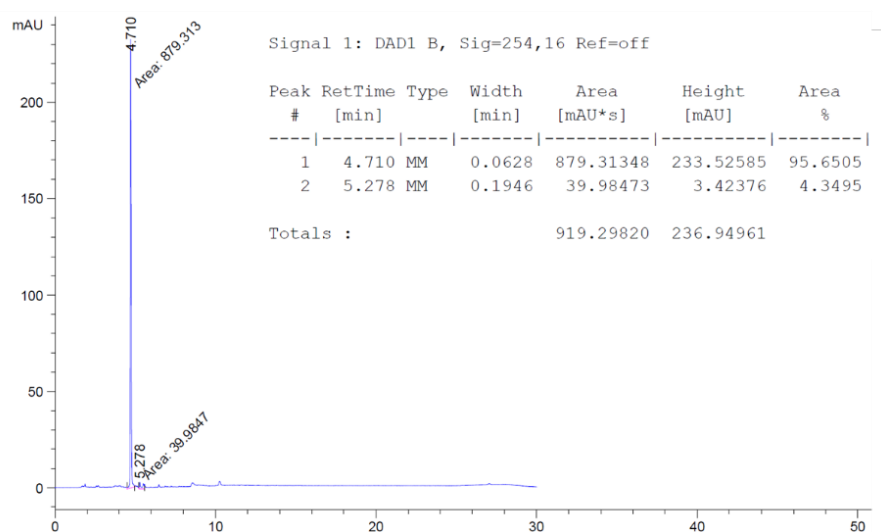

### Compound 7

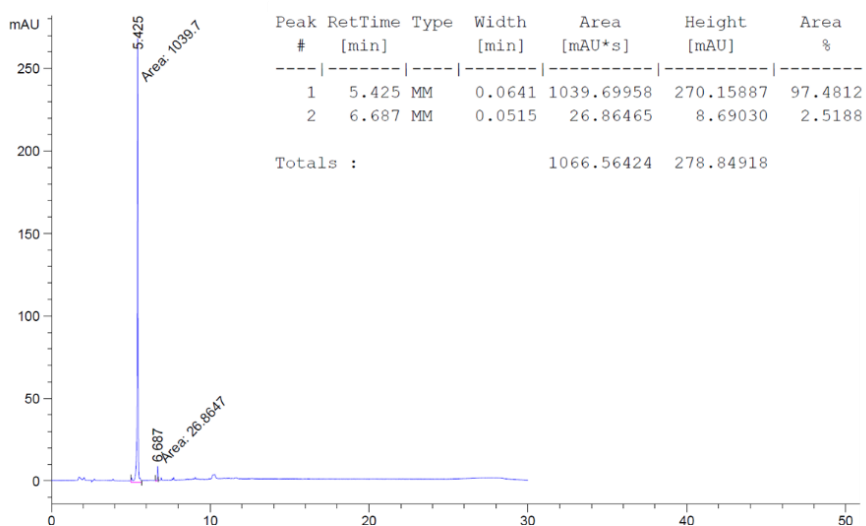

### Compound 8

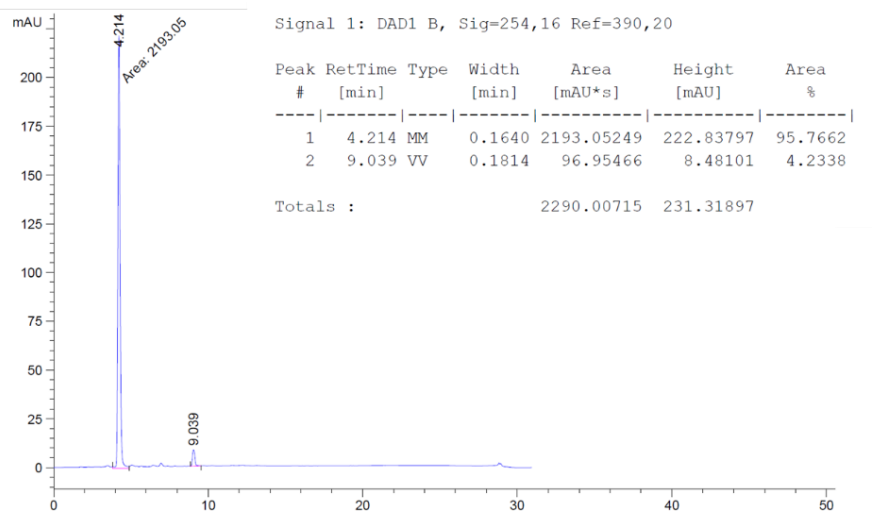

**Figure S2.** Purity evaluation of **3**, **7**, and **8** subjected to bioassays by HPLC analysis subjected to bioassays (Phenomenex Gemini 5 $\mu$ m C18 110A column, in gradient conditions (CH<sub>3</sub>CN to 30%, t<sub>s</sub> min 80%, and t<sub>22</sub> min 80%), flow 1 mL/min,  $\lambda$  254nm).

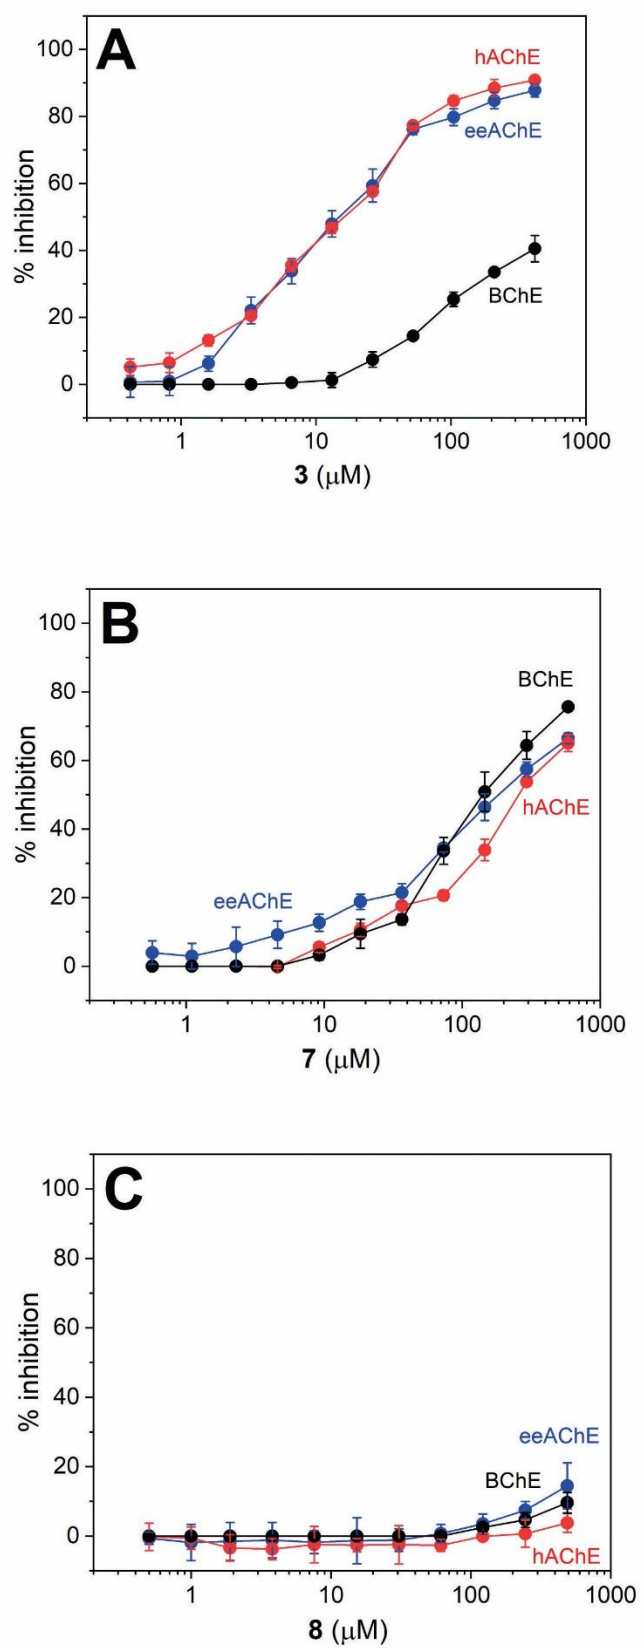

**Figure S3.** Inhibition of electric eel acetylcholinesterase (eeAChE, ●), human recombinant acetylcholinesterase (hAChE, ●) or horse serum butyrylcholinesterase (BChE, ●) by increasing concentrations of compounds 3 (A), 7 (B) and 8 (C). The activity was monitored as described in the Chapter 3.2.

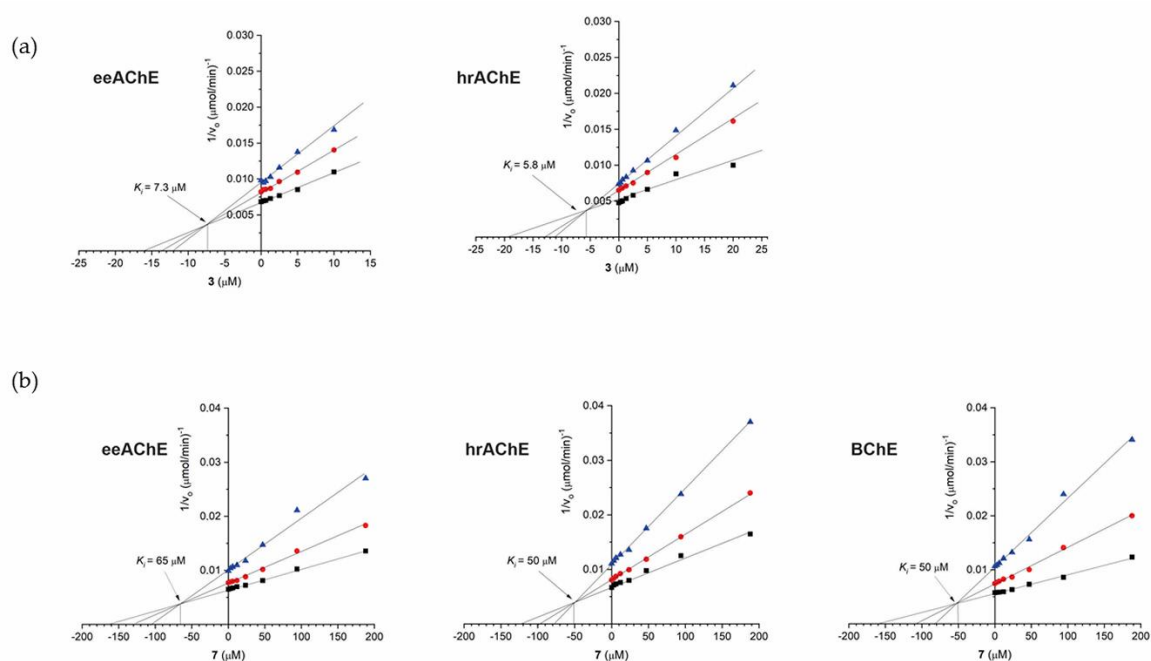

**Figure S4.** Determination of type of inhibition and inhibition constants ( $K_i$ ) for (a) compound 3 and (b) compound 7 towards electric eel acetylcholinesterase (eeAChE), human recombinant acetylcholinesterase (hAChE), and horse serum butyrylcholinesterase (BChE) by Dixon plot analysis. Substrate (acetylthiocholine chloride) concentrations:  $0.125 \text{ mM}$  ( $\blacktriangle$ ),  $0.25 \text{ mM}$  ( $\bullet$ ),  $0.5 \text{ mM}$  ( $\blacksquare$ ).

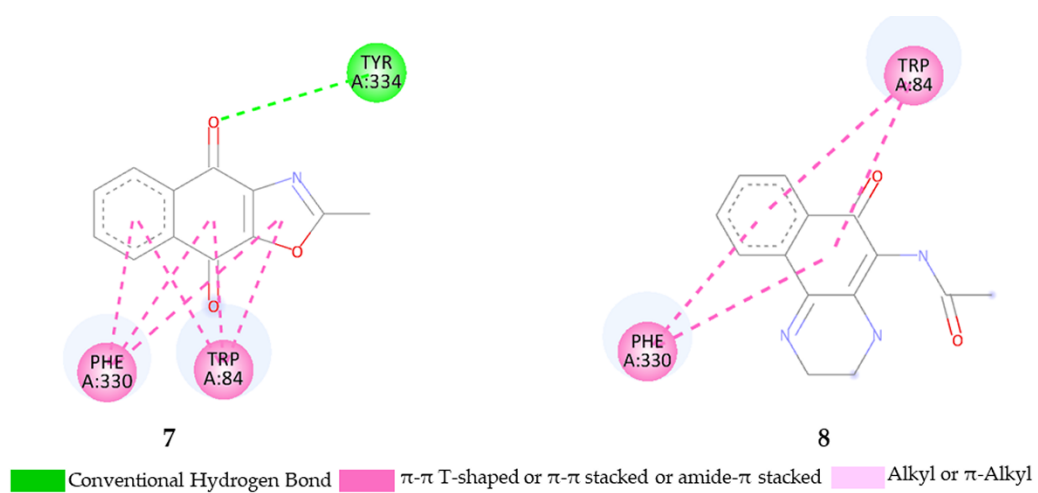

**Figure S5.** Two-dimensional views of the interactions, by AutoDock Vina calculation, between *T. californica* AChE (6G1V) and compounds 7 and 8.

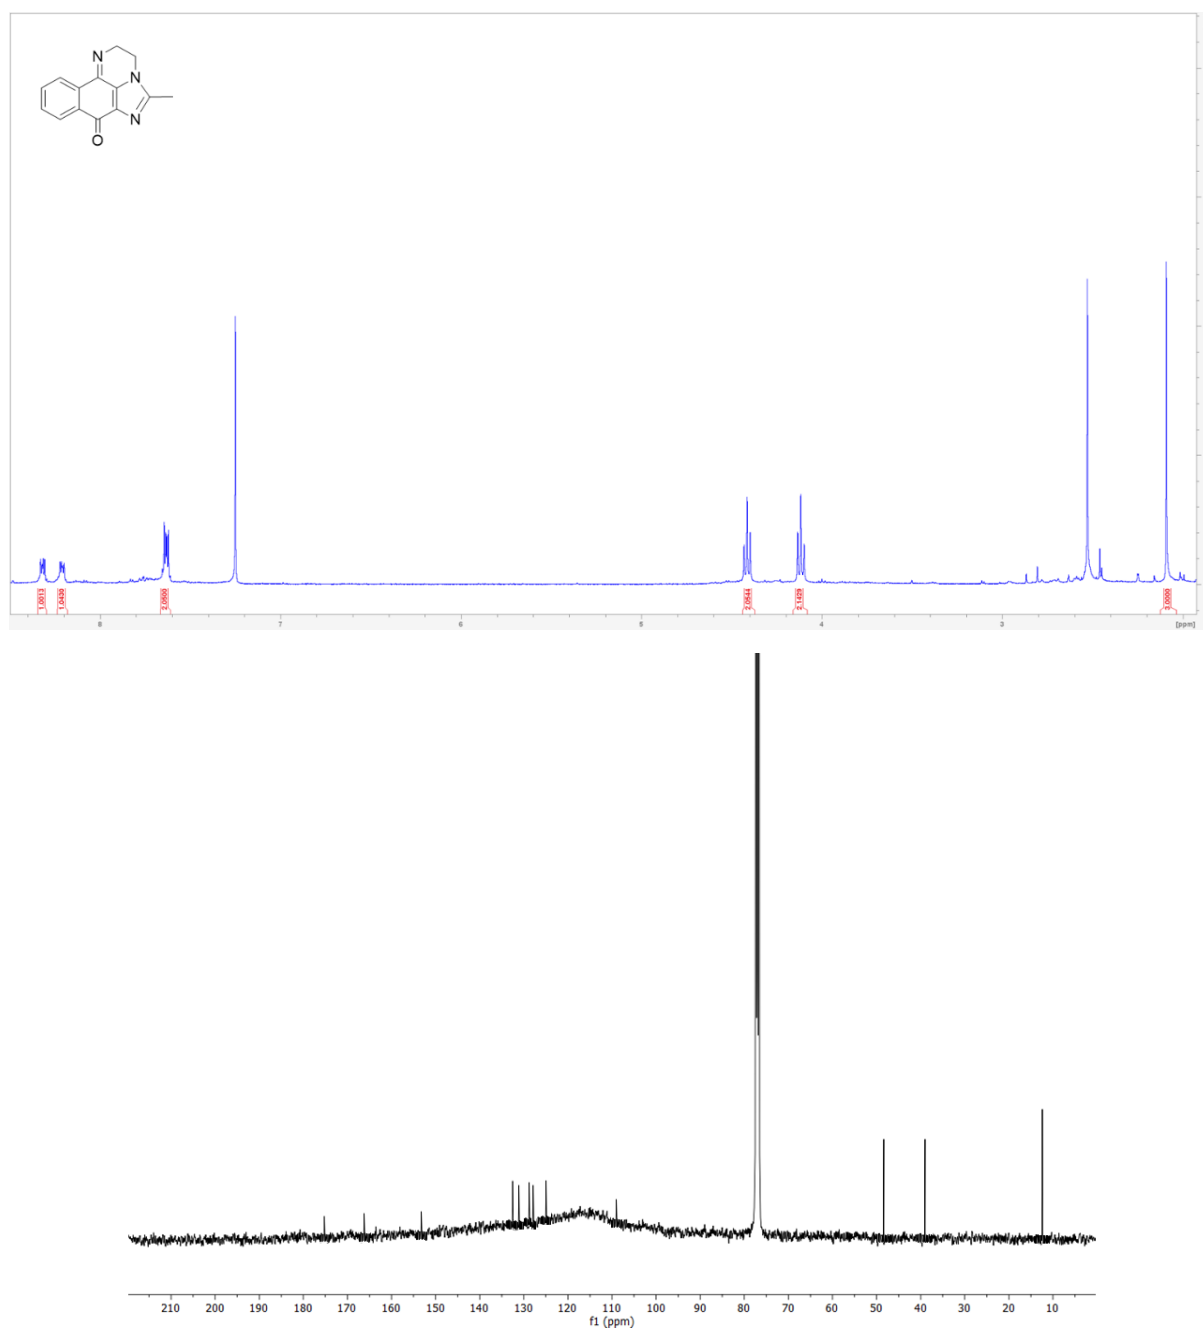

**Figure S6.**  $^1\text{H}$  NMR spectrum (400 MHz, in  $\text{CDCl}_3$ ) of compound **3** as acetate salt, and  $^{13}\text{C}$  NMR spectrum (100 MHz, in  $\text{CDCl}_3$ ) of neutral **3**.

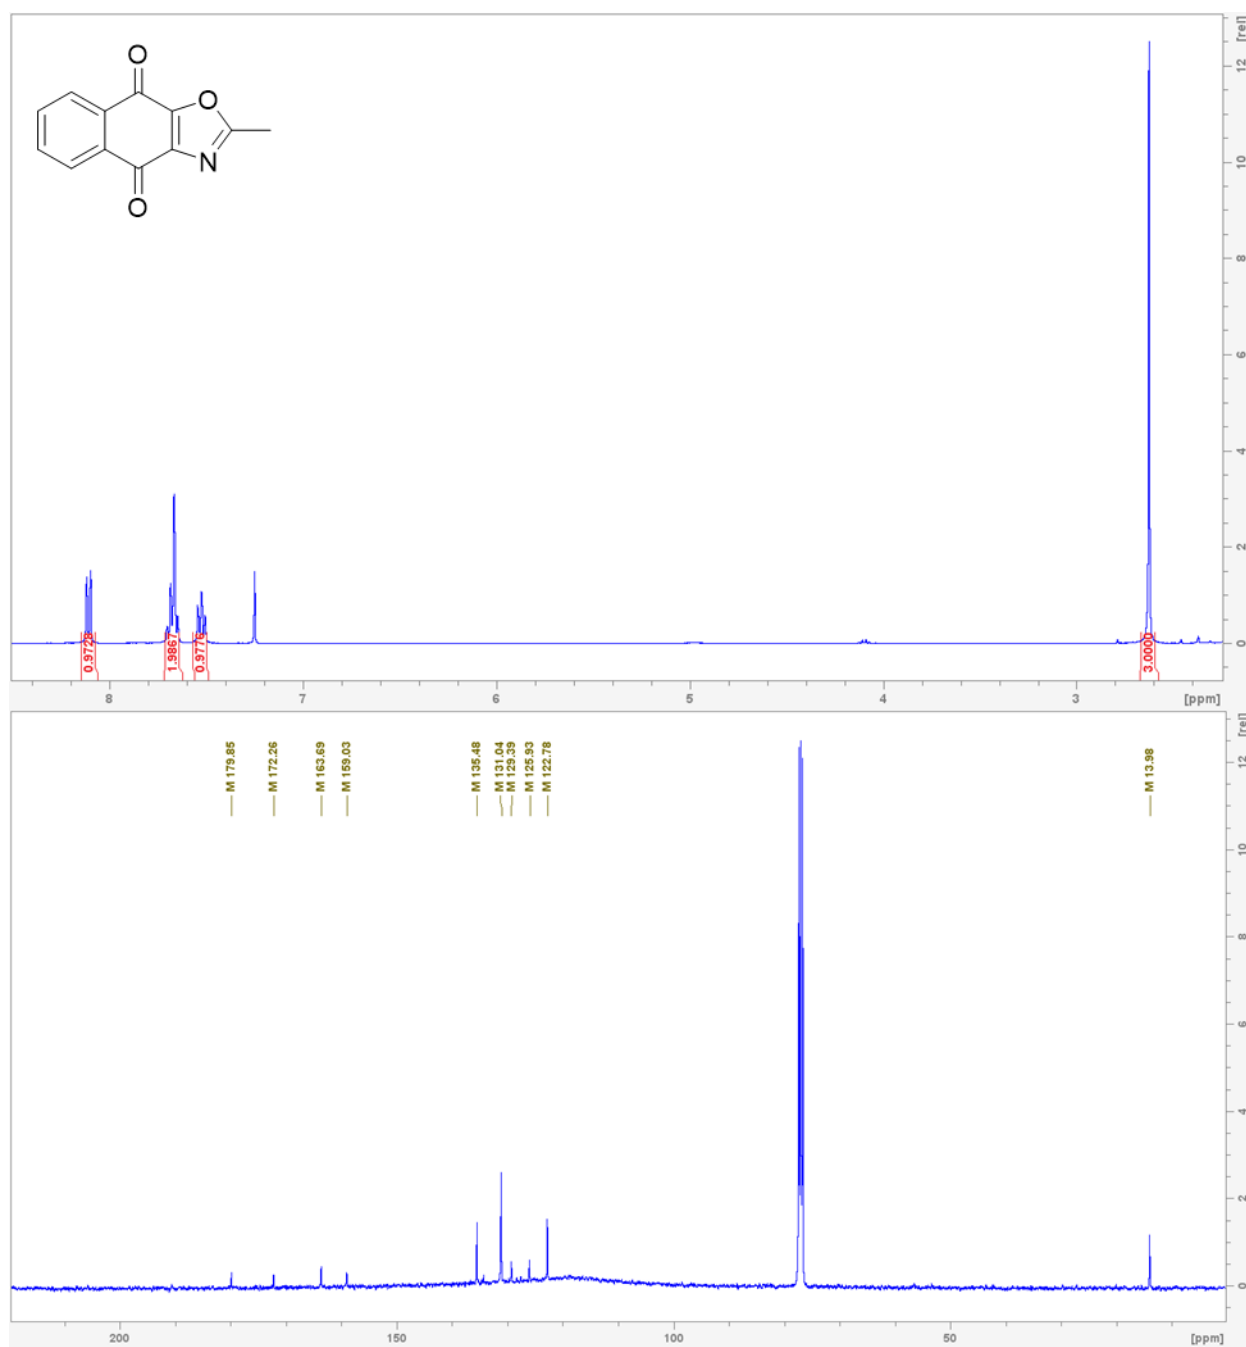

**Figure S7.** <sup>1</sup>H and <sup>13</sup>CNMR spectra in CDCl<sub>3</sub>, at 400 MHz and 100 MHz respectively of compound **7**.



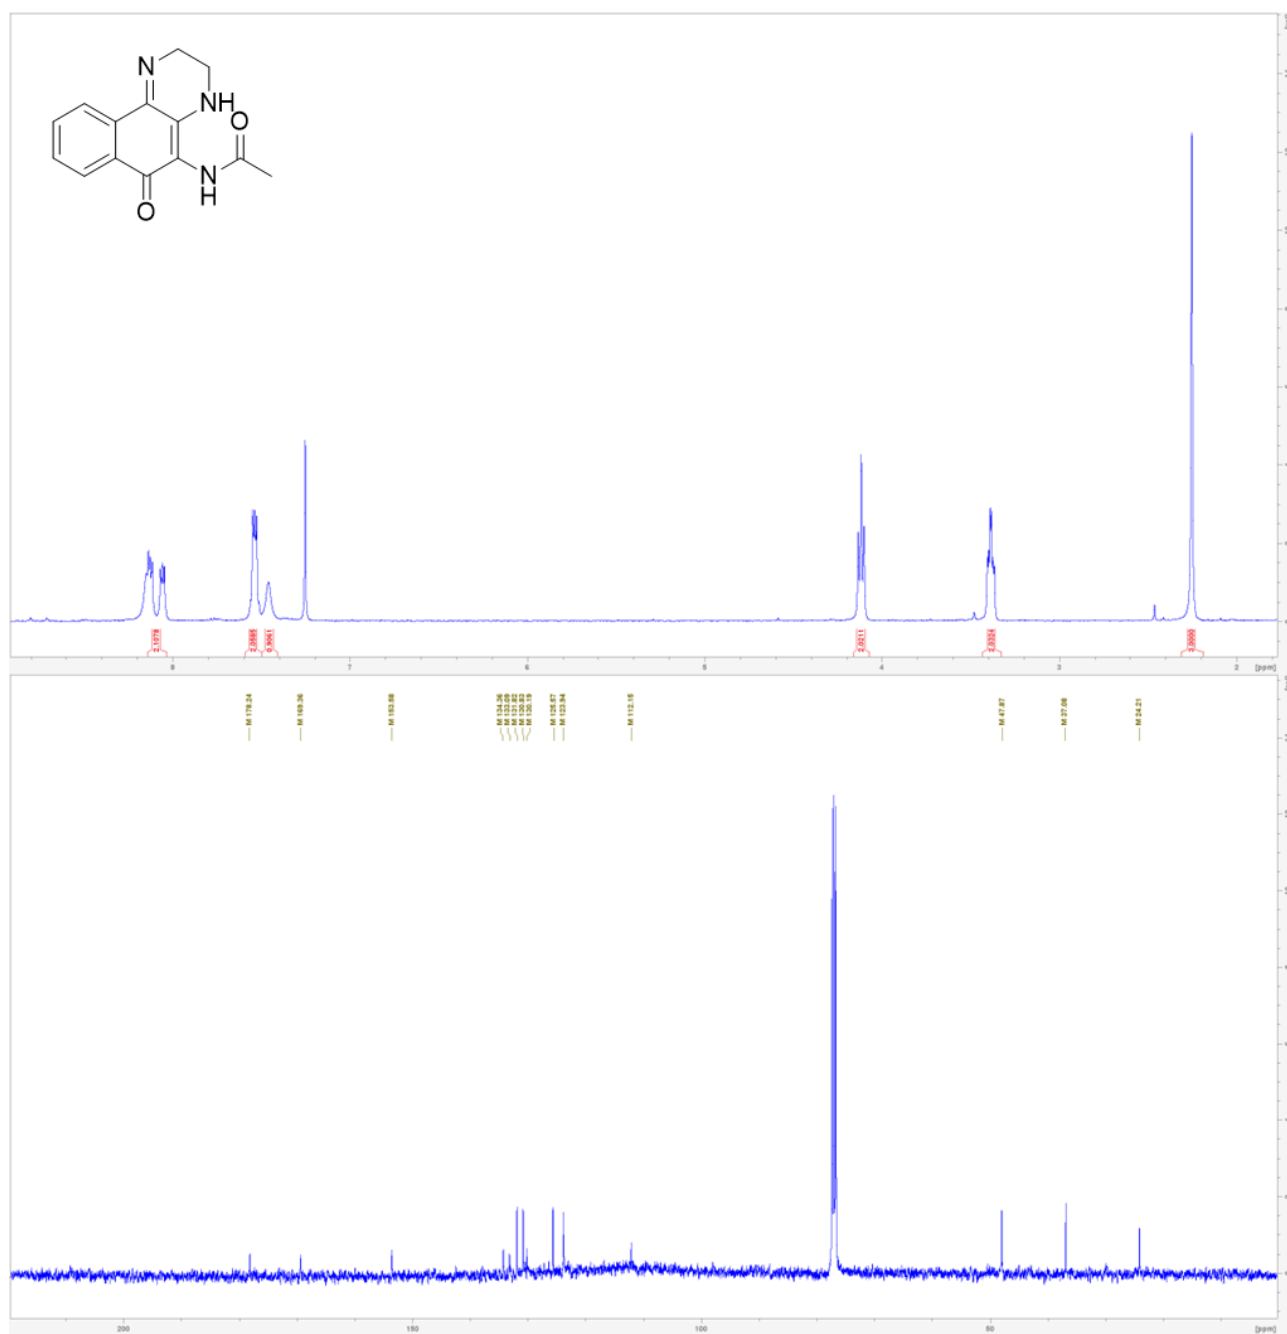

**Figure S8.** <sup>1</sup>H and <sup>13</sup>CNMR spectra in CDCl<sub>3</sub>, at 400 MHz and 100 MHz respectively of compound **8**.
